# Supplementary material
Source: PubMed Central journal article supplement (PMC4253529)
Supplement: embj0033-2422-sd9.pdf [file embj0033-2422-sd9.pdf]

Supplementary Table 1. Data collection and refinement statistics

|                                                               | Mre11-DNA1 <sup>1</sup> | Mre11-DNA2 <sup>1</sup> |
|---------------------------------------------------------------|-------------------------|-------------------------|
| <b>Data collection</b>                                        |                         |                         |
| Wavelength (Å)                                                | 0.9795                  | 0.9795                  |
| Space group                                                   | P2 <sub>1</sub>         | P2 <sub>1</sub>         |
| Cell dimensions a,b,c (Å)                                     | 91.5 185.6 106.2        | 90.5 184.0 106.6        |
| α, β, γ (°)                                                   | 90 99.9 90              | 90 99.5 90              |
| Resolution <sup>2</sup> (Å)                                   | 50-3.55 (3.6-3.55)      | 50-3.52 (3.58-3.52)     |
| Measured reflections                                          | 318,323                 | 194,226                 |
| Unique reflections                                            | 41,919                  | 42,468                  |
| Completeness (%)                                              | 100 (100)               | 98.8 (98.8)             |
| Average (I/σ)                                                 | 13.3 (2.3)              | 13 (2.5)                |
| $R_{\text{sym}}$ <sup>3</sup>                                 | 0.166 (0.971)           | 0.200 (0.950)           |
| Resolution (Å) ( $R_{\text{sym}} < 0.5$ ) <sup>4</sup>        | 3.82                    | 3.83                    |
| <b>Refinement</b>                                             |                         |                         |
| Resolution range (Å)                                          | 42.42-3.55              | 47.29-3.59              |
| No. reflections                                               | 39,539                  | 39,755                  |
| $R_{\text{working}}$ (%) / $R_{\text{free}}$ (%) <sup>5</sup> | 18.4/23.6               | 19.4/25.3               |
| No. atoms (B-factors (Å <sup>2</sup> ))                       |                         |                         |
| Total                                                         | 16104 (144.4)           | 16013 (181.9)           |
| Protein                                                       | 15480 (143)             | 15480 (179.5)           |
| DNA/Mg <sup>2+</sup>                                          | 592/ 12 (189.3/ 70.8)   | 533/ - (256.9/ -)       |
| water                                                         | 20 (66.8)               | -                       |
| R.m.s. bond lengths (Å)                                       | 0.009                   | 0.005                   |
| R.m.s. bond angles (°)                                        | 1.2                     | 1.1                     |
| Ramachandran plot <sup>6</sup>                                |                         |                         |
| Favored (%)                                                   | 94.9                    | 93.2                    |
| Allowed (%)                                                   | 4.5                     | 6.3                     |
| Disallowed (%)                                                | 0.6                     | 0.5                     |

<sup>1</sup>Mg<sup>2+</sup> ions are added in the crystallization buffer for the Mre11-DNA1 and -DNA2 complexes. However, we observed the clear Mg<sup>2+</sup> ion density only in the Mre11-DNA1 structure.

<sup>2</sup>Values in parentheses are for the highest shell.

<sup>3</sup> $R_{\text{sym}} = \sum_h \sum_i |I_{h,i} - \bar{I}_h| / \sum_h \sum_i I_{h,i}$ , where  $\bar{I}_h$  is the mean intensity of the  $i$  observations of symmetry related reflections of  $h$ .

<sup>4</sup>Resolution where the  $R_{\text{sym}}$  values are lower than 0.5

<sup>5</sup> $R = \frac{\sum |F_{\text{obs}} - F_{\text{calc}}|}{\sum F_{\text{obs}}}$ , where  $F_{\text{obs}} = F_{\text{pi}}$  and  $F_{\text{calc}}$  is the calculated protein structure factor from the atomic model ( $R_{\text{free}}$  was calculated with 5% of the reflections). R.m.s. deviation in bond lengths and angles are the deviations from ideal values.

<sup>6</sup>Ramachandran plot is calculated by Molprobit (Chen et al, 2010).
