# Supplementary material
Source: PubMed Central journal article supplement (PMC4253529)
Supplement: embj0033-2422-sd10.pdf [file embj0033-2422-sd10.pdf]

**Supplementary Table 2. Types of NHEJ repair events in *mre11* mutants.**

| Mutation types <sup>a</sup>                       |       | <i>MRE11</i>            | <i>mre11-K62A</i> | <i>mre11-H125N</i> | <i>mre11-R184A</i> |            |
|---------------------------------------------------|-------|-------------------------|-------------------|--------------------|--------------------|------------|
| Original sequence: TCCGCAACAGTATAATT <sup>b</sup> |       |                         |                   |                    |                    |            |
| Insertion                                         | Total | 27 (46.6%) <sup>c</sup> | 89 (75.4%)        | 52 (89.7%)         | 49 (77.8%)         |            |
|                                                   | +A    | TCCGCAACAAGTATAAT       | 1 (1.7%)          | 1 (0.8%)           | 0                  | 0          |
|                                                   | +CA   | TCCGCAACAACGTATAAT      | 13 (22.4)         | 33 (28.0%)         | 15 (25.9%)         | 25 (39.7%) |
|                                                   | +ACA  | TCCGCAACAACAGTATAAT     | 11 (19.0%)        | 49 (41.5%)         | 37 (63.8%)         | 24 (38.1%) |
|                                                   | +AA   | TCCGCAAAACAGTATAAT      | 0                 | 0                  | 0                  | 1 (1.6%)   |
|                                                   | +CACA | TCCGCAACACACAGTATAAT    | 2 (3.4%)          | 1 (0.8%)           | 0                  | 0          |
| Deletion                                          | Total | 28 (48.3)               | 27 (22.9%)        | 2 (3.5%)           | 11 (17.5%)         |            |
|                                                   | -A    | TTCCGC*ACAGTATAAT       | 4 (6.9%)          | 2 (1.7%)           | 0                  | 3 (4.8%)   |
|                                                   |       | TTCCGCAAC*GTATAAT       | 0                 | 1 (0.8%)           | 0                  | 0          |
|                                                   | -CA   | TCCGCAA**GTATAATT       | 10 (17.2%)        | 1 (0.8%)           | 0                  | 2 (3.2%)   |
|                                                   | -ACA  | TCCGCA***GTATAATT       | 13 (22.4%)        | 14 (11.9%)         | 1 (1.7%)           | 2 (3.2%)   |
|                                                   | -AACA | TCCGC****GTATAATT       | 1 (1.7)           | 2 (1.7%)           | 0                  | 1 (1.6%)   |
|                                                   | -C    | TCCG*ACAGTATAAT         | 1 (1.7%)          | 1 (0.8%)           | 0                  | 0          |
|                                                   |       | TCCGCAA*AGTATAAT        | 0                 | 1 (0.8%)           | 0                  | 0          |
|                                                   | -GC   | TCC**AACAGTATAAT        | 0                 | 0                  | 0                  | 1 (1.6%)   |
|                                                   | -G    | TCCGCAACA*ATAATT        | 0                 | 2 (1.7%)           | 1 (1.7%)           | 2 (3.2%)   |
|                                                   | -GT   | TCCGCAACA**ATAATT       | 1 (1.7%)          | 0                  | 0                  | 0          |
|                                                   | -GTA  | TCCGCAACA***TAATT       | 0                 | 1 (0.8%)           | 0                  | 0          |
|                                                   | -GTAT | TCCGCAACA****AATT       | 0                 | 2 (1.7%)           | 0                  | 0          |
| Large deletion (>4bp)                             |       | 3 (5.2%)                | 8 (6.8%)          | 4 (6.9%)           | 3 (4.8%)           |            |
| Total                                             |       | 58 (100%)               | 118 (100%)        | 58 (100%)          | 63 (100%)          |            |

<sup>a</sup> Alignment of the sequences flanking the HO cleavage site at the proximal boundary of the Z1 region in the *MATa* locus among survivors after persistent HO expression. <sup>b</sup> The 3' 4-bp overhang created after HO cleavage is underlined, the sequence highlighted by grey indicates inserted sequences whereas those with asterisk indicate deleted sequences.

<sup>c</sup> The percentage of relative fractions of a specific repair event in the total number of the repair junction analyzed.
