# Supplementary material
Source: PubMed Central journal article supplement (PMC4253529)
Supplement: embj0033-2422-sd11.pdf [file embj0033-2422-sd11.pdf]

Supplementary Table 3. Sequence of the primers used in this study

| <b>Oligo name</b> | <b>Sequence (5' --&gt; 3')</b> |
|-------------------|--------------------------------|
| R55S              | TAACGATTTGAGTCCTCCAGTAA        |
| R89S              | ATGAAATGCCAAGTAGGTTAGGG        |
| K129A             | ATTATCACGCAAAGAGCAAAAGAGA      |
| K132D             | ACAAAAGAGCGATAGAGAGGAG         |
| I302R             | AAAGCTATTCGTGTAGATGACGAA       |
| I302Y             | AATAAAGCTATTTATGTAGATGACGAATT  |
| K59C              | CCTCCAGTATGCGCTTTAAGA          |
| E94C              | TTAGGGGAGTGCTCTCCATTA          |
| V58C              | AGACCTCCATGCAAAGCTTTAAGA       |
| L99C              | CCATTAGCCTGCCTAAAAGATTAC       |
