# Supplementary material
Source: PubMed Central journal article supplement (PMC4253529)
Supplement: embj0033-2422-sd12.pdf [file embj0033-2422-sd12.pdf]

**Supplementary Table 4.** Genotypes of strains used in this work

| Strain no. | Genotype                                                                                                        | Reference                       |
|------------|-----------------------------------------------------------------------------------------------------------------|---------------------------------|
| BY4741     | <i>MATa his3Δ leu2Δ met15Δ0 ura3Δ</i>                                                                           | Open Biosystems, Huntsville, AL |
| YFL228     | BY4741 <i>mre11Δ::URA3</i>                                                                                      | This study                      |
| YFL229     | BY4741 <i>mre11-K62A</i>                                                                                        | This study                      |
| YFL230     | BY4741 <i>mre11-R184</i>                                                                                        | This study                      |
| YFL231     | BY4741 <i>mre11-K62A sgs1Δ::HPH</i>                                                                             | This study                      |
| YFL234     | BY4741 <i>mre11-R184A sgs1Δ::HPH</i>                                                                            | This study                      |
| JKM139     | <i>hoΔ hml::ADE1 MATa hmr::ADE1 ade1 leu2-3,112 lys5 trp1::hisG ura3-52 ade3::GAL10::HO</i>                     | Shim, <i>et al.</i> 2010        |
| YFL246     | JKM139 <i>mre11-K62A</i>                                                                                        | This study                      |
| YFL248     | JKM139 <i>mre11- R184A</i>                                                                                      | This study                      |
| YFL249     | JKM139 <i>mre11-K62A sgs1Δ::KAN</i>                                                                             | This study                      |
| YFL252     | JKM139 <i>mre11-R184A sgs1Δ::HPH</i>                                                                            | This study                      |
| YFL256     | JKM139 <i>mre11-H125N</i>                                                                                       | This study                      |
| YFL259     | JKM139 <i>sgs1 Δ::KAN</i>                                                                                       | This study                      |
| YFL261     | JKM139 <i>mre11-H125N sgs1Δ::HPH</i>                                                                            | This study                      |
| YFL332     | BY4741 <i>MRE11-3xHA::KAN,</i>                                                                                  | This study                      |
| YFL333     | BY4741 <i>XRS2-13xMYC::HIS3</i>                                                                                 | This study                      |
| YFL334     | BY4741 <i>MRE11-3xHA::KAN, XRS2-13xMYC::HIS3</i>                                                                | This study                      |
| YFL335     | BY4741 <i>mre11-K62A-3xHA::KAN, XRS2-13xMYC::HIS3</i><br>BY4741 <i>mre11-R184A-3xHA::KAN, XRS2-13xMYC::HIS3</i> | This study                      |
| YFL336     | BY4741 <i>MRE11-3xHA::KAN, RAD50-13xMYC::HIS3</i><br>BY4741 <i>mre11-K62A-3xHA::KAN, RAD50-13xMYC::HIS3</i>     | This study                      |
| YFL337     | BY4741 <i>mre11-R184A-3HA::KAN, RAD50-13xMYC::HIS3</i>                                                          | This study                      |
| YFL338     |                                                                                                                 | This study                      |
| YFL339     |                                                                                                                 | This study                      |
